# Supplementary material
Source: PubMed Central journal article supplement (PMC6750228)
Supplement: NIHMS1046062-supplement-1.pdf [file NIHMS1046062-supplement-1.pdf]

# Supplemental Material

## Snowpack Measurements Suggest Role for Multi-year Sea Ice Regions in Arctic Atmospheric Bromine and Chlorine Chemistry

Peter K. Peterson<sup>1\*</sup>, Mark Hartwig<sup>1</sup>, Nathaniel W. May<sup>1</sup>, Evan Schwartz<sup>1†</sup>, Ignatius Rigor<sup>2</sup>, Wendy Ermold<sup>2</sup>, Michael Steele<sup>2</sup>, James H. Morison<sup>2</sup>, Son V. Nghiem<sup>3</sup>, and Kerri A. Pratt<sup>1,4,\*</sup>

<sup>1</sup>Department of Chemistry, University of Michigan, Ann Arbor, Michigan, USA.

<sup>2</sup>Applied Physics Laboratory, University of Washington, Seattle, Washington, USA.

<sup>3</sup>Jet Propulsion Laboratory, California Institute of Technology, Pasadena, California, USA.

<sup>4</sup>Department of Earth and Environmental Sciences, University of Michigan, Ann Arbor, Michigan, USA.

\*Corresponding Author: prattka@umich.edu

December 10, 2018

### List of Contents:

**Figure S1.** Profiles of bromide and chloride within the snowpack at 5 sites. The seawater ratio (Millero et al., 2008) is plotted for reference.

**Table S1.** Sample pH, location, snowpack depth, sampling depth, and sea ice type.

**Table S2.** Sample ion concentrations ( $\mu\text{M}$ ) and uncertainties for  $\text{Na}^+$ ,  $\text{Mg}^{2+}$ ,  $\text{Ca}^{2+}$ ,  $\text{K}^+$ ,  $\text{Cl}^-$ ,  $\text{SO}_4^{2-}$ ,  $\text{Br}^-$ , and  $\text{NO}_3^-$ .

---

\*Currently at Department of Chemistry, Whittier College, Whittier, California, USA.

†Currently at Department of Molecular Biosciences, University of Texas, Austin, Texas, USA.

Table S 1: Sample pH, location, snowpack depth, sampling depth, and sea ice type.

| Sample_ID                    | Date      | pH   | pH Stdev | Latitude | Longitude | FYI/MYI | Snow Depth (cm) | Sample Depth (cm) |
|------------------------------|-----------|------|----------|----------|-----------|---------|-----------------|-------------------|
| UW-07 1-3cm                  | 5/7/2013  | 5.38 | 0.09     | 83.42    | 84.44     | MYI     | 7               | 0                 |
| UW-07 2-5cm                  | 5/7/2013  | 5.28 | 0.10     | 83.42    | 84.44     | MYI     | 7               | 2                 |
| UW-05 4-7cm                  | 5/3/2013  | 5.78 | 0.06     | 85.98    | 45.37     | MYI     | 10              | 4                 |
| UW-05 1-3cm                  | 5/3/2013  | 5.95 | 0.07     | 85.98    | 45.37     | MYI     | 10              | 0                 |
| UW-06 2-5cm                  | 5/3/2013  | 6.61 | 0.27     | 85.63    | 54.37     | MYI     | 35              | 2                 |
| UW-06 3-7cm                  | 5/3/2013  | 6.17 | 0.06     | 85.63    | 54.37     | MYI     | 35              | 4                 |
| UW-14 1-3cm                  | 5/15/2013 | 5.69 | 0.03     | 85.51    | 32.11     | MYI     | 65              | 0                 |
| UW-01 Top Layer              | 4/30/2013 | 5.52 | 0.04     | 83.09    | 95.14     | MYI     | 12              | 0                 |
| UW-06 1-3cm                  | 5/3/2013  | 5.96 | 0.18     | 85.63    | 54.37     | MYI     | 35              | 0                 |
| UW-11 2-5cm                  | 5/13/2013 | 5.68 | 0.12     | 84.49    | 24.78     | MYI     | 9               | 2                 |
| UW-11 1-3cm                  | 5/13/2013 | 5.39 | 0.08     | 84.49    | 24.78     | MYI     | 9               | 0                 |
| UW-05 2-5cm                  | 5/3/2013  | 5.10 | 0.09     | 85.98    | 45.37     | MYI     | 10              | 2                 |
| UW-14 2-5cm                  | 5/15/2013 | 5.44 | 0.09     | 85.51    | 32.11     | MYI     | 65              | 2                 |
| UW-14 4-7cm                  | 5/15/2013 | 5.24 | 0.12     | 85.51    | 32.11     | MYI     | 65              | 4                 |
| UW-07 4-7cm                  | 5/7/2013  | 6.11 | 0.13     | 83.42    | 84.44     | MYI     | 7               | 4                 |
| UW-10 1-3cm                  | 5/11/2013 | 6.64 | 0.04     | 83.01    | 55.02     | MYI     | 6.5             | 0                 |
| UW-03 1-3cm                  | 5/2/2013  | 5.83 | 0.07     | 85.13    | 45.06     | MYI     | 12.5            | 0                 |
| UW-11 4-7cm                  | 5/13/2013 | 6.20 | 0.08     | 84.49    | 24.78     | MYI     | 9               | 4                 |
| UW-15 1-3cm                  | 5/15/2013 | 5.24 | 0.04     | 86.35    | 29.08     | FYI     | 9               | 0                 |
| Camden Bay #5                | 2/24/2014 | 6.10 | 0.09     | 70.33    | -145.71   | FYI     | 8               | 0                 |
| Camden Bay #4                | 2/24/2014 | 4.97 | 0.05     | 70.40    | -145.38   | FYI     | 8               | 0                 |
| Peard Bay #1                 | 2/26/2014 | 5.06 | 0.07     | 71.62    | -157.18   | MYI     |                 | 0                 |
| Peard Bay #2                 | 2/26/2014 | 4.83 | 0.04     | 71.62    | -157.18   | MYI     |                 | 0                 |
| Peard Bay #3                 | 2/26/2014 | 5.09 | 0.02     | 70.20    | -148.45   | MYI     |                 | 0                 |
| Camden Bay #3                | 2/27/2014 | 4.78 | 0.07     | 70.36    | -145.56   | FYI     | 8               | 0                 |
| Camden Bay #1                | 2/24/2014 | 5.67 | 0.11     | 70.32    | -145.85   | FYI     | 8               | 0                 |
| Camden Bay #2                | 2/24/2014 | 5.03 | 0.06     | 70.33    | -145.71   | FYI     | 8               | 0                 |
| MYI #6 5-10cm                | 2/26/2014 | 5.54 | 0.10     | 71.80    | -157.08   | FYI     | 15              | 0                 |
| Site B (Harrison Bay)        | 2/25/2014 | 5.04 | 0.05     | 70.70    | -149.42   | FYI     | 27              | 0                 |
| Site A (Harrison Bay)        | 2/25/2014 | 4.89 | 0.10     | 70.62    | -149.82   | FYI     | 10.5            | 0                 |
| MYI 10-15cm                  | 2/26/2014 | 5.62 | 0.05     | 71.80    | -157.08   | FYI     | 15              | 0                 |
| Site C                       | 2/25/2014 | 4.84 | 0.11     | 70.84    | -149.37   | FYI     | 7.5             | 0                 |
| Barneo SS 4/18/13 13:43      | 4/18/2013 |      |          | 84.96    | -169.84   | FYI     | 15              | 0                 |
| Barneo SS 4/5/13 14:00       | 4/5/2013  |      |          | 89.56    | -145.75   | FYI     | 15              | 0                 |
| Barneo SS 4/5/13 14:13       | 4/5/2013  |      |          | 89.56    | -145.75   | FYI     | 15              | 0                 |
| Barneo 4/5/13 14:13          | 4/5/2013  |      |          | 89.56    | -145.75   | FYI     | 15              | 0                 |
| Barneo SS 4/18/14 14:30 (b)  | 4/18/2014 | 4.95 | 0.01     | 85.94    | 89.90     | FYI     | 15              | 0                 |
| Barneo SS 4/17/13 16:25 (n)  | 4/17/2013 |      |          | 81.01    | 179.65    | FYI     | 15              | 0                 |
| Barneo 4/14/13 10:33         | 4/14/2013 |      |          | 84.96    | 89.37     | FYI     | 15              | 0                 |
| Barneo 4/18/14 14:30 Surface | 4/18/2013 | 5.71 | 0.07     | 89.99    | -1.49     | FYI     | 15              | 0                 |
| Barneo 4/18/14 14:30 15cm    | 4/18/2014 | 5.38 | 0.07     | 89.99    | -1.49     | FYI     | 15              | 15                |
| Barneo 4/21/14 12cm          | 4/21/2014 | 5.38 | 0.04     | 88.06    | 14.24     | FYI     | 37              | 12                |

Table S 2: Sample ion concentrations ( $\mu\text{M}$ ) and uncertainties for  $\text{Na}^+$ ,  $\text{Mg}^{2+}$ ,  $\text{Ca}^{2+}$ ,  $\text{K}^+$ ,  $\text{Cl}^-$ ,  $\text{SO}_4^{2-}$ ,  $\text{Br}^-$ , and  $\text{NO}_3^-$ . BDL stands for below detection limit.

| Sample_ID                    | Na <sup>+</sup> | Na Er   | Mg <sup>2+</sup> | Mg <sup>2+</sup> Er | Ca <sup>2+</sup> | Ca <sup>2+</sup> Er | K <sup>+</sup> | K <sup>+</sup> Er | Cl <sup>-</sup> | Cl <sup>-</sup> Err | SO <sub>4</sub> <sup>2-</sup> | SO <sub>4</sub> <sup>2-</sup> Er | Br <sup>-</sup> | Br <sup>-</sup> Er | NO <sub>3</sub> <sup>-</sup> | NO <sub>3</sub> <sup>-</sup> Er |
|------------------------------|-----------------|---------|------------------|---------------------|------------------|---------------------|----------------|-------------------|-----------------|---------------------|-------------------------------|----------------------------------|-----------------|--------------------|------------------------------|---------------------------------|
| UW-07 1-3cm                  | 66.01           | 5.01    | 4.01             | 0.31                | 3.42             | 0.58                | 2.53           | 0.23              | 98.21           | 9.15                | 8.65                          | 1.55                             | 0.54            | 0.08               | 4.39                         | 0.43                            |
| UW-07 2-5cm                  | 74.92           | 7.07    | 5.89             | 1.71                | 2.90             | 0.57                | 2.85           | 0.19              | 146.79          | 3.06                | 9.74                          | 0.49                             | 0.42            | 0.03               | 4.79                         | 0.15                            |
| UW-05 4-7cm                  | 151.87          | 4.87    | 19.05            | 1.16                | 4.66             | 0.08                | 5.01           | 0.29              | 282.49          | 13.35               | 23.33                         | 0.79                             | 1.01            | 0.04               | 6.35                         | 0.37                            |
| UW-05 1-3cm                  | 52.26           | 6.79    | BDL              | BDL                 | 1.04             | 0.41                | 1.59           | 0.31              | 66.59           | 1.46                | 9.59                          | 0.91                             | 0.54            | 0.01               | 4.96                         | 0.05                            |
| UW-06 2-5cm                  | 8.55            | 2.57    | BDL              | BDL                 | 0.22             | 0.06                | 0.12           | 0.16              | 7.81            | 0.68                | 0.53                          | 0.17                             | 0.86            | 0.01               | 1.81                         | 0.01                            |
| UW-06 3-7cm                  | 24.84           | 3.57    | BDL              | BDL                 | 0.64             | 0.11                | 1.00           | 0.10              | 39.94           | 1.77                | 2.73                          | 1.33                             | 0.18            | 0.01               | 3.89                         | 0.25                            |
| UW-14 1-3cm                  | 140.70          | 4.53    | 14.13            | 0.14                | 4.53             | 0.09                | 4.45           | 0.15              | 266.26          | 0.54                | 13.92                         | 1.71                             | 0.19            | 0.01               | 7.94                         | 0.08                            |
| UW-01 Top Layer              | 166.57          | 4.43    | 32.59            | 0.56                | 24.64            | 1.04                | 7.38           | 0.07              | 395.58          | 5.87                | 7.02                          | 0.80                             | 0.19            | 0.06               | 2.53                         | 0.07                            |
| UW-06 1-3cm                  | 10.50           | 4.10    | BDL              | BDL                 | 0.49             | 0.47                | 0.24           | 0.04              | 14.34           | 0.33                | 4.07                          | 0.24                             | 0.32            | 0.05               | 3.44                         | 0.19                            |
| UW-11 2-5cm                  | 124.40          | 5.70    | 14.77            | 1.08                | 3.22             | 0.17                | 4.32           | 0.18              | 251.49          | 2.08                | 8.89                          | 0.64                             | 0.13            | 0.03               | 2.74                         | 0.08                            |
| UW-11 1-3cm                  | 199.84          | 4.91    | 26.03            | 0.56                | 7.06             | 0.29                | 6.62           | 0.17              | 396.09          | 3.50                | 19.53                         | 1.74                             | 0.28            | 0.00               | 4.03                         | 0.08                            |
| UW-05 2-5cm                  | 102.90          | 5.54    | 8.96             | 0.95                | 1.91             | 0.14                | 2.90           | 0.12              | 169.59          | 1.96                | 16.54                         | 0.69                             | 0.78            | 0.02               | 6.76                         | 0.27                            |
| UW-14 2-5cm                  | 122.02          | 1.41    | 13.51            | 0.48                | 3.28             | 0.07                | 3.82           | 0.03              | 238.55          | 0.78                | 8.61                          | 0.34                             | 0.16            | 0.01               | 7.53                         | 0.09                            |
| UW-14 4-7cm                  | 120.19          | 4.02    | 13.01            | 0.51                | 3.20             | 0.29                | 3.69           | 0.11              | 230.18          | 0.67                | 11.29                         | 0.43                             | 0.15            | 0.01               | 7.21                         | 0.03                            |
| UW-07 4-7cm                  | 11724.41        | 2428.39 | 2338.11          | 395.58              | 522.27           | 37.88               | 606.59         | 113.37            | 27061.14        | 835.26              | 2048.74                       | 154.42                           | 99.27           | 4.56               | 87.89                        | 11.43                           |
| UW-10 1-3cm                  | 1826.55         | 255.57  | BDL              | BDL                 | 21.34            | 5.72                | 61.47          | 19.94             | 2183.18         | 164.12              | 427.67                        | 43.20                            | 5.32            | 0.95               | 41.23                        | 5.18                            |
| UW-03 1-3cm                  | 7501.68         | 495.90  | BDL              | BDL                 | 94.22            | 13.74               | 231.81         | 18.66             | 11718.37        | 636.28              | 514.02                        | 104.93                           | 26.93           | 3.49               | 50.23                        | 8.00                            |
| UW-11 4-7cm                  | 19341.61        | 469.59  | 1273.23          | 47.75               | 318.81           | 23.49               | 574.41         | 15.33             | 21760.30        | 56.66               | 7407.98                       | 8.88                             | 5.97            | 1.88               | 26.18                        | 3.78                            |
| UW-15 1-3cm                  | 192.77          | 2.69    | 32.33            | 0.53                | 6.79             | 0.08                | 7.65           | 0.25              | 388.09          | 1.35                | 31.26                         | 0.43                             | 1.35            | 0.19               | 6.70                         | 0.29                            |
| Camden Bay #5                | 164.52          | 0.94    | 17.88            | 0.42                | 4.38             | 0.18                | 5.14           | 0.02              | 310.97          | 1.39                | 14.95                         | 1.79                             | 0.80            | 0.01               | 1.33                         | 0.09                            |
| Camden Bay #4                | 172.00          | 8.60    | 26.75            | 0.61                | 5.09             | 0.19                | 6.75           | 0.40              | 350.19          | 16.55               | 11.60                         | 2.08                             | 0.48            | 0.04               | 6.48                         | 0.54                            |
| Peard Bay #1                 | 69.08           | 2.88    | 8.77             | 0.26                | 2.11             | 0.05                | 2.39           | 0.20              | 147.20          | 1.12                | 4.62                          | 0.48                             | 0.44            | 0.01               | 8.53                         | 2.24                            |
| Peard Bay #2                 | 197.48          | 0.67    | 22.46            | 0.33                | 3.94             | 0.19                | 6.85           | 0.09              | 390.86          | 1.36                | 8.33                          | 0.53                             | 0.60            | 0.01               | 2.30                         | 0.06                            |
| Peard Bay #3                 | 132.16          | 1.89    | 22.44            | 0.59                | 3.60             | 0.27                | 6.14           | 0.13              | 293.88          | 1.29                | 5.29                          | 0.58                             | 0.19            | 0.01               | 5.52                         | 3.20                            |
| Camden Bay #3                | 238.22          | 54.75   | 26.04            | 5.70                | 4.58             | 0.64                | 7.26           | 1.46              | 526.67          | 1.58                | 7.14                          | 0.32                             | 0.66            | 0.01               | 4.45                         | 0.09                            |
| Camden Bay #1                | 216.89          | 2.42    | 27.87            | 0.02                | 4.40             | 0.11                | 7.15           | 0.07              | 423.06          | 0.44                | 18.13                         | 0.43                             | 0.95            | 0.01               | 0.49                         | 0.06                            |
| Camden Bay #2                | 322.47          | 3.58    | 45.69            | 0.57                | 7.49             | 0.14                | 11.56          | 0.05              | 685.28          | 2.70                | 5.91                          | 0.66                             | 1.61            | 0.01               | 4.35                         | 3.11                            |
| MYI #6 5-10cm                | 27.12           | 4.52    | 2.40             | 0.42                | 1.02             | 0.19                | 0.97           | 0.17              | 49.75           | 3.37                | 3.87                          | 1.96                             | 0.12            | 0.03               | 8.06                         | 10.81                           |
| Site B (Harrison Bay)        | 166.22          | 2.16    | 18.07            | 0.21                | 3.32             | 0.28                | 5.15           | 0.08              | 331.91          | 2.54                | 6.35                          | 4.43                             | 0.23            | 0.01               | 9.98                         | 14.09                           |
| Site A (Harrison Bay)        | 218.65          | 1.60    | 29.38            | 0.28                | 4.28             | 0.08                | 7.66           | 0.23              | 455.89          | 0.13                | 5.49                          | 1.26                             | 0.32            | 0.03               | 3.90                         | 3.51                            |
| MYI 10-15cm                  | 17.75           | 5.05    | 1.42             | 0.29                | 1.10             | 0.42                | 0.57           | 0.04              | 32.90           | 1.08                | 1.60                          | 0.57                             | 0.12            | 0.02               | 1.16                         | 0.10                            |
| Site C                       | 112.54          | 4.89    | 8.74             | 0.82                | 2.18             | 0.22                | 3.44           | 0.19              | 133.60          | 2.02                | 1.31                          | 0.22                             | 0.32            | 0.02               | 0.80                         | 0.40                            |
| Barneo SS 4/18/13 13:43 Mark | 169.49          | 4.07    | 19.06            | 0.48                | 4.28             | 0.38                | 18.86          | 0.27              | 354.32          | 22.43               | 10.17                         | 1.93                             | 0.27            | 0.03               | 4.96                         | 0.52                            |
| Barneo SS 4/5/13 14:00       | 90.29           | 0.82    | 11.92            | 0.93                | 3.26             | 0.11                | 21.69          | 1.13              | 225.52          | 6.18                | 9.11                          | 0.73                             | 0.32            | 0.01               | 3.26                         | 0.09                            |
| Barneo SS 4/5/13 14:13       | 24.98           | 7.21    | 3.31             | 0.04                | 2.65             | 0.84                | 23.76          | 2.05              | 95.46           | 2.63                | 5.49                          | 1.22                             | 0.27            | 0.00               | 4.65                         | 0.18                            |
| Barneo 4/5/13 14:13          | 165.18          | 14.09   | 16.91            | 1.47                | 3.30             | 0.45                | 4.56           | 0.51              | 301.77          | 7.71                | 13.14                         | 0.66                             | 0.56            | 0.01               | 0.84                         | 0.09                            |
| Barneo SS 4/18/14 14:30 (b)  | 53.83           | 9.89    | BDL              | BDL                 | 0.25             | 0.06                | 16.77          | 4.17              | 55.27           | 1.70                | 2.02                          | 0.32                             | 0.29            | 0.01               | 1.05                         | 0.03                            |
| Barneo SS 4/17/13 16:25 (n)  | 407.63          | 20.58   | 40.65            | 4.80                | 10.02            | 1.54                | 28.23          | 2.57              | 498.56          | 53.86               | 10.83                         | 1.64                             | 0.75            | 0.07               | 1.69                         | 0.27                            |
| Barneo 4/14/13 10:33         | 224.51          | 5.90    | 24.06            | 1.36                | 7.62             | 0.42                | 8.66           | 0.31              | 292.01          | 2.08                | 6.26                          | 0.67                             | 0.79            | 0.07               | 3.31                         | 0.90                            |
| Barneo 4/18/14 14:30 Surface | 351.86          | 6.27    | 43.92            | 0.14                | 0.56             | 0.97                | 0.72           | 0.26              | 379.86          | 4.17                | 55.08                         | 0.18                             | 1.65            | 0.25               | 3.08                         | 0.92                            |
| Barneo 4/18/14 14:30 15cm    | 172.25          | 29.56   | 23.79            | 4.20                | 1.72             | 0.46                | 7.81           | 0.17              | 366.32          | 22.88               | 7.68                          | 0.59                             | 0.47            | 0.03               | 4.06                         | 0.12                            |
| Barneo 4/21/14 12cm          | 391.14          | 3.53    | 54.89            | 1.47                | 4.72             | 0.54                | 5.64           | 0.25              | 809.90          | 9.20                | 10.16                         | 0.31                             | 1.35            | 0.14               | 3.32                         | 0.26                            |

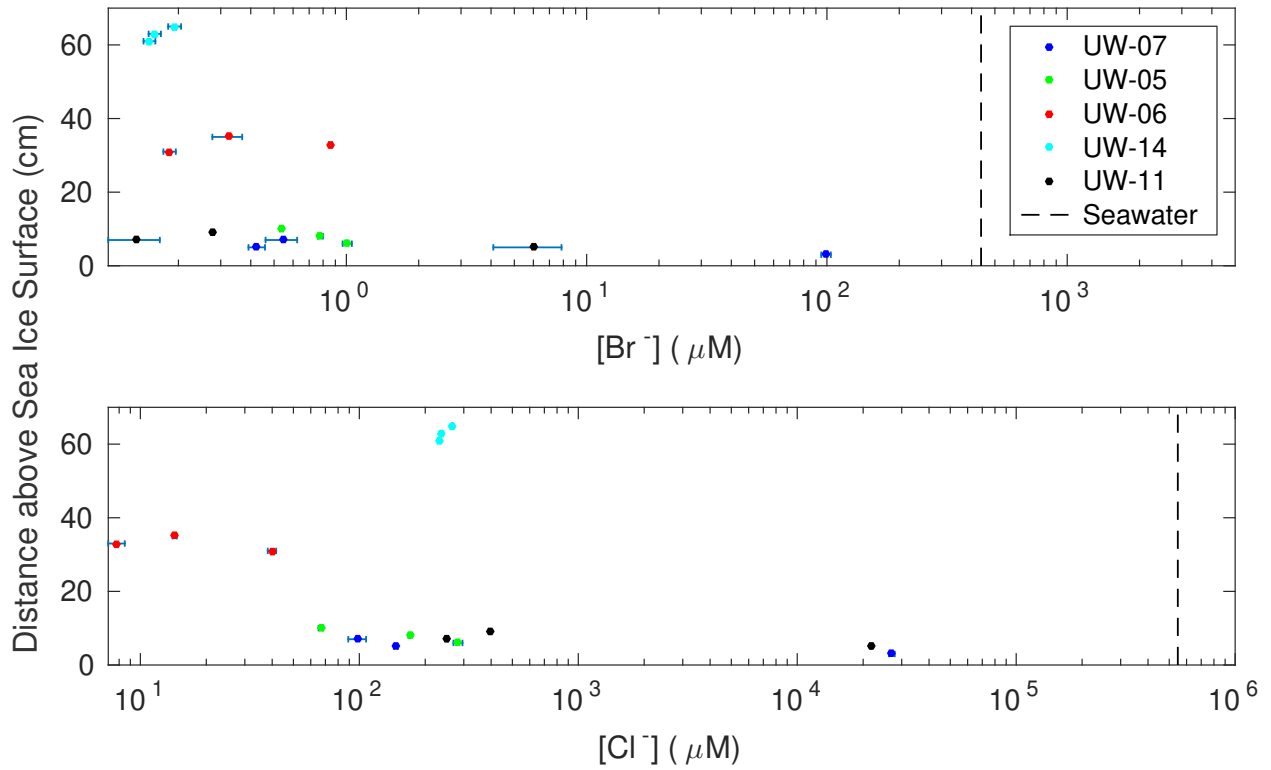

Figure S 1: Profiles of bromide and chloride within the snowpack at 5 sites. The seawater ratio (Millero et al., 2008) is plotted for reference.

## References

Millero FJ, Feistel R, Wright DG, McDougall TJ. 2008. The composition of Standard Seawater and the definition of the Reference-Composition Salinity Scale. *Deep-Sea Research Part I: Oceanographic Research Papers* **55**(1): 50–72. ISSN 09670637. doi:10.1016/j.dsr.2007.10.001.
